# Supplementary material
Source: publisher figshare collection journal article supplement (https://acs.figshare.com/ndownloader/files/3781090)
Supplement: Supplementary file 1 [file 3781090]

# Exploring Second-Order Nonlinear Optical Properties and Switching Ability of a Series of Dithienylethene-Containing, Cyclometalated Platinum Complexes: A Theoretical Investigation

Jian Lin<sup>†‡</sup>, Rongjian Sa<sup>†</sup>, Mingxing Zhang<sup>‡</sup>, Kechen Wu<sup>†\*</sup>

<sup>†</sup>*Fujian Institute of Research on the Structure of Matter, Chinese Academy of Sciences, Fuzhou, Fujian 350002, People's Republic of China*

<sup>‡</sup>*College of Mechanical and Electrical Engineering, Fujian Agriculture and Forest University, Fuzhou, Fujian 350002, People's Republic of China*

## Supporting Information

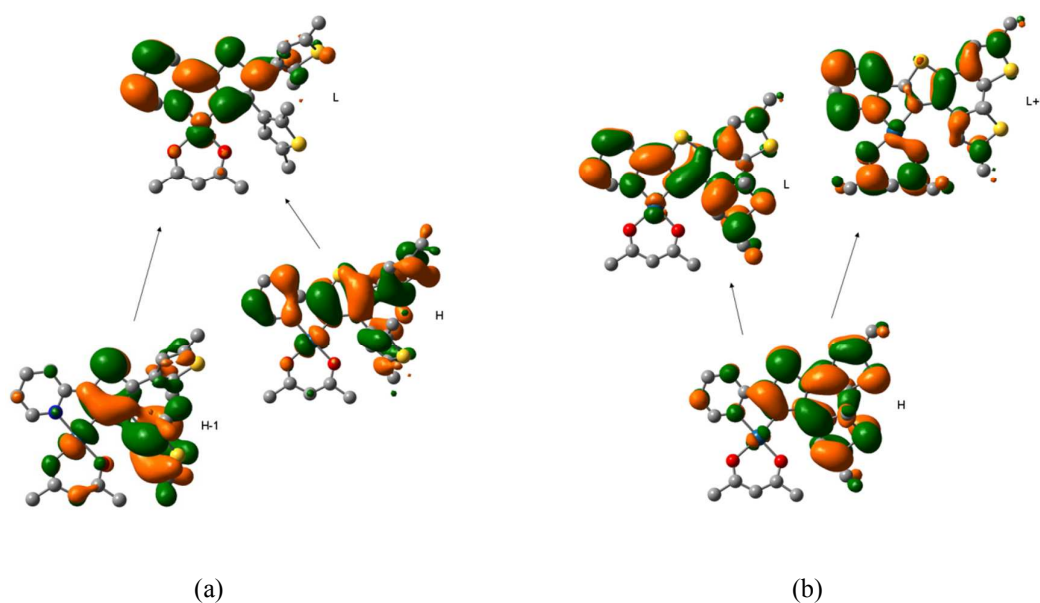

Figure S1: The major transition orbitals of the original complex 1a synthesized by Yam et al. (ref.37), open-form (a) and closed-form (b).

\* E-mail: [wkc@fjirsm.ac.cn](mailto:wkc@fjirsm.ac.cn). Fax: 86-591-83792932

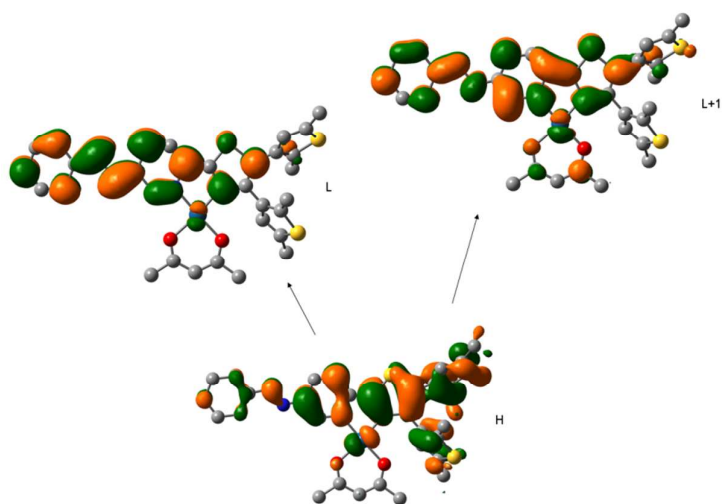

(a)

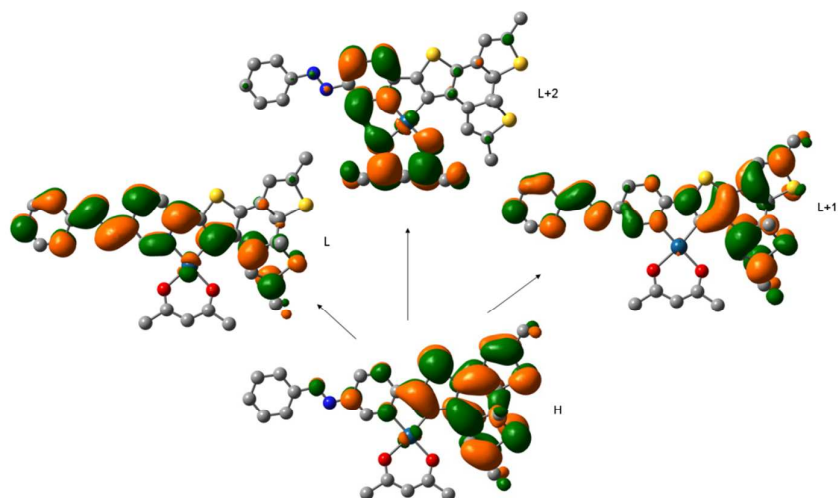

(b)

Figure S2: The major transition orbitals of model complex **1** in this paper, open-form (a) and closed-form (b).
